# Supplementary material
Source: PubMed Central journal article supplement (PMC3226941)
Supplement: neo1311_1035SD1.pdf [file neo1311_1035SD1.pdf]

**Table W1.** Primers for *C-CBL* Mutation Analysis by cDNA PCR Assay.

| Primer Name    | Primer Sequence 5'→3'       | Amplicon Size (bp) | Method            |
|----------------|-----------------------------|--------------------|-------------------|
| CBL-ex6-F      | CTCCAGACAATCCCTCACAATAAA    | 350                | DHPLC             |
| CBL-ex9-R      | ACCACGATGGGTTTCAGTACCTTTA   |                    |                   |
| CBL-ex8-9-F    | ACTGTGAGATGGGCTCCACATT      | 374                | DHPLC             |
| CBL-ex8-9-R-gc | cgccggggcGAAGCTTGTGGGGCCATG |                    |                   |
| CBL-ex6-F      | CTCCAGACAATCCCTCACAATAAA    | 533                | Direct sequencing |
| CBL-ex8-9-R    | GAAGCTTGTGGGGCCATG          |                    |                   |

**Table W2.** Primers for *C-CBL* Mutation Analysis by gDNA PCR Assay.

| Primer Name  | Primer Sequence 5'→3'                         | Amplicon Size (bp) | Method            |
|--------------|-----------------------------------------------|--------------------|-------------------|
| CBL-ex7-F-gc | cgcccgcgcccGGCAAATTGGCTTAAATAAAACC            | 187                | DHPLC             |
| CBL-ex7-R    | GTGTCCAGTGATATGGTTATCATG                      |                    |                   |
| CBL-ex9-F    | CTATCTTTTGCTTCTTCTGCA                         | 323                | DHPLC             |
| CBL-ex9-R-gc | gacggcggcggcggcggcggcTCGTTAAGTGTTTTACGGCTTTAG |                    |                   |
| CBL-7F       | CTTACACCACGTTGCCCTTT                          | 364                | Direct sequencing |
| CBL-7R       | TGGGTCTATTTAAGCTCCA                           |                    |                   |
| CBL-8F       | AGGACCCAGACTAGATGCTTTC                        | 387                | Direct sequencing |
| CBL-8R       | GGCCACCCCTTGTATCAGTA                          |                    |                   |
| CBL-9F       | CTGGCTTTTGGGGTTAGGTT                          | 400                | Direct sequencing |
| CBL-9R       | TCGTTAAGTGTTTTACGGCTTT                        |                    |                   |
